# Supplementary material for: Associations between urban metrics and mortality rates in England
Source: PubMed Central journal article supplement (PMC4895780; doi:10.1186/s12940-016-0106-3), 2016-03-08
Supplement: 12940_2016_106_MOESM2_ESM.pdf [file 12940_2016_106_MOESM2_ESM.pdf]

## Additional File 2 - City characteristics: Standardised Mortality Ratios (SMRs) for all-cause and cause specific mortality and urban metrics

| City          | SMRs      |      |                   | Urban metrics                |                                           |                                          |                                       |                                           |                         |                    |                                  |                                      |
|---------------|-----------|------|-------------------|------------------------------|-------------------------------------------|------------------------------------------|---------------------------------------|-------------------------------------------|-------------------------|--------------------|----------------------------------|--------------------------------------|
|               | All cause | CVD  | Traffic Accidents | City size (km <sup>2</sup> ) | Population density (pop/km <sup>2</sup> ) | Minor road density (km/km <sup>2</sup> ) | Junction density (N/km <sup>2</sup> ) | Population within 100m of major roads (%) | Shannon Diversity Index | Altitude range (m) | Population on income support (%) | NO <sup>2</sup> (µg/m <sup>3</sup> ) |
| Birmingham    | .99       | 1.03 | 1.13              | 305.9                        | 3,518                                     | 6.7                                      | 31.5                                  | 19                                        | 1.72                    | 187                | 24                               | 37                                   |
| Blackburn     | 1.19      | .94  | .84               | 26.7                         | 3,554                                     | 7.8                                      | 49.7                                  | 26                                        | 1.71                    | 157                | 26                               | 29                                   |
| Blackpool     | 1.14      | .89  | 1.07              | 34.0                         | 4,154                                     | 10.8                                     | 80.2                                  | 28                                        | 1.51                    | 31                 | 21                               | 28                                   |
| Bolton        | 1.13      | 1.15 | 1.32              | 55.1                         | 3,047                                     | 7.1                                      | 51.6                                  | 27                                        | 1.86                    | 295                | 23                               | 33                                   |
| Bournemouth   | .91       | 1.00 | 1.02              | 44.2                         | 3,697                                     | 9.1                                      | 50.3                                  | 20                                        | 1.37                    | 64                 | 13                               | 27                                   |
| Bradford      | 1.13      | .91  | 1.15              | 84.4                         | 3,309                                     | 7.3                                      | 44.8                                  | 24                                        | 1.82                    | 280                | 26                               | 33                                   |
| Brighton      | .90       | 1.00 | .97               | 33.6                         | 3,837                                     | 7.5                                      | 47.9                                  | 26                                        | 2.01                    | 193                | 17                               | 27                                   |
| Bristol       | .94       | 1.05 | .99               | 113.2                        | 3,652                                     | 8.1                                      | 49.2                                  | 23                                        | 1.46                    | 159                | 15                               | 28                                   |
| Cambridge     | .88       | 1.09 | .92               | 40.1                         | 2,707                                     | 4.7                                      | 22.7                                  | 17                                        | 1.98                    | 39                 | 8                                | 24                                   |
| Coventry      | .97       | .97  | .90               | 75.8                         | 3,832                                     | 7.8                                      | 37.3                                  | 18                                        | 1.68                    | 69                 | 18                               | 27                                   |
| Derby         | .92       | 1.15 | .97               | 78.5                         | 2,863                                     | 6.3                                      | 31.0                                  | 13                                        | 1.56                    | 99                 | 18                               | 27                                   |
| Dudley        | 1.01      | 1.03 | 1.03              | 58.0                         | 3,361                                     | 7.5                                      | 39.2                                  | 21                                        | 1.53                    | 195                | 16                               | 36                                   |
| Exeter        | .89       | .93  | 1.49              | 43.9                         | 2,442                                     | 5.8                                      | 24.7                                  | 19                                        | 1.86                    | 160                | 12                               | 24                                   |
| Gloucester    | .91       | 1.06 | .70               | 40.4                         | 2,856                                     | 6.2                                      | 26.3                                  | 15                                        | 1.80                    | 196                | 13                               | 24                                   |
| Huddersfield  | 1.06      | .90  | 1.43              | 61.2                         | 2,149                                     | 6.3                                      | 33.6                                  | 17                                        | 2.19                    | 309                | 18                               | 26                                   |
| Hull          | 1.04      | .88  | 1.15              | 99.4                         | 2,987                                     | 6.4                                      | 28.3                                  | 9                                         | 1.67                    | 59                 | 22                               | 26                                   |
| Ipswich       | .87       | 1.02 | 1.07              | 53.4                         | 2,580                                     | 6.3                                      | 31.6                                  | 18                                        | 1.88                    | 52                 | 13                               | 25                                   |
| Leeds         | 1.01      | 1.29 | .85               | 135.2                        | 3,185                                     | 7.8                                      | 52.5                                  | 15                                        | 1.78                    | 175                | 19                               | 32                                   |
| Leicester     | 1.02      | .79  | .80               | 92.3                         | 3,529                                     | 7.9                                      | 45.6                                  | 15                                        | 1.64                    | 67                 | 20                               | 29                                   |
| Liverpool     | 1.19      | 1.03 | 1.75              | 109.8                        | 4,166                                     | 9.6                                      | 61.8                                  | 23                                        | 1.44                    | 85                 | 30                               | 34                                   |
| Luton         | 1.01      | 1.02 | .71               | 43.4                         | 4,253                                     | 7.5                                      | 34.8                                  | 9                                         | 1.54                    | 78                 | 16                               | 27                                   |
| Manchester    | 1.14      | .82  | .83               | 110.7                        | 3,526                                     | 8.6                                      | 59.9                                  | 21                                        | 1.68                    | 82                 | 29                               | 38                                   |
| Middlesbrough | 1.07      | 1.01 | .66               | 59.0                         | 2,443                                     | 6.0                                      | 30.2                                  | 14                                        | 1.97                    | 137                | 26                               | 25                                   |
| Milton Keynes | .94       | 1.06 | 1.08              | 80.2                         | 2,196                                     | 6.4                                      | 24.6                                  | 5                                         | 2.01                    | 62                 | 11                               | 23                                   |
| Newcastle     | 1.10      | .81  | .90               | 48.5                         | 4,020                                     | 9.5                                      | 59.6                                  | 25                                        | 1.57                    | 122                | 26                               | 34                                   |
| Northampton   | .93       | 1.17 | .96               | 57.1                         | 3,177                                     | 6.2                                      | 31.3                                  | 18                                        | 2.04                    | 73                 | 12                               | 25                                   |
| Norwich       | .84       | .97  | .90               | 62.8                         | 2,676                                     | 6.3                                      | 30.9                                  | 22                                        | 1.74                    | 51                 | 15                               | 26                                   |
| Nottingham    | 1.07      | .93  | 1.32              | 66.0                         | 3,729                                     | 7.7                                      | 43.2                                  | 21                                        | 1.44                    | 110                | 25                               | 31                                   |
| Oldham        | 1.21      | .89  | .79               | 31.3                         | 3,398                                     | 8.1                                      | 57.3                                  | 26                                        | 1.86                    | 272                | 27                               | 34                                   |
| Oxford        | .84       | .98  | 1.03              | 42.5                         | 3,202                                     | 5.8                                      | 30.                                   | 26                                        | 1.91                    | 78                 | 10                               | 22                                   |
| Peterborough  | 1.00      | 1.11 | .80               | 80.3                         | 1,705                                     | 4.2                                      | 16.4                                  | 10                                        | 2.05                    | 33                 | 17                               | 23                                   |
| Plymouth      | .96       | 1.15 | .98               | 75.1                         | 3,209                                     | 7.9                                      | 39.2                                  | 17                                        | 1.60                    | 164                | 16                               | 26                                   |

|                 |      |      |      |       |       |     |      |    |      |     |    |    |
|-----------------|------|------|------|-------|-------|-----|------|----|------|-----|----|----|
| Poole           | .84  | 1.07 | 1.42 | 54.2  | 2,611 | 6.9 | 29.9 | 21 | 1.51 | 86  | 9  | 26 |
| Portsmouth      | .96  | 1.06 | .78  | 35.1  | 5,194 | 9.3 | 57.7 | 25 | 1.73 | 125 | 14 | 29 |
| Preston         | 1.04 | .88  | .99  | 63.0  | 2,746 | 6.9 | 40.2 | 24 | 1.78 | 130 | 15 | 27 |
| Reading         | .83  | .80  | .65  | 72.9  | 3,136 | 5.9 | 25.7 | 16 | 1.77 | 75  | 7  | 27 |
| Rotherham       | 1.13 | 1.21 | 1.12 | 34.5  | 2,356 | 6.2 | 33.9 | 21 | 1.84 | 124 | 25 | 29 |
| Sheffield       | .98  | .99  | 1.18 | 147.3 | 2,961 | 7.5 | 41.6 | 22 | 1.81 | 365 | 19 | 29 |
| Slough          | .89  | .91  | .74  | 28.3  | 4,299 | 7.7 | 35.9 | 12 | 1.45 | 45  | 13 | 32 |
| Southampton     | .89  | 1.03 | 1.13 | 53.6  | 4,255 | 8.0 | 44.4 | 17 | 1.48 | 83  | 14 | 29 |
| Southend-on-Sea | .98  | .94  | .84  | 41.0  | 3,905 | 8.7 | 44.6 | 16 | 1.58 | 61  | 16 | 27 |
| St. Helens      | 1.13 | .89  | 1.07 | 37.1  | 2,600 | 6.6 | 37.5 | 21 | 1.94 | 68  | 21 | 30 |
| Stockport       | 1.05 | 1.15 | 1.32 | 35.7  | 3,817 | 7.8 | 48.1 | 22 | 1.73 | 77  | 14 | 34 |
| Stoke-on-Trent  | 1.09 | 1.00 | 1.02 | 96.5  | 2,529 | 6.1 | 37.3 | 25 | 1.70 | 163 | 19 | 24 |
| Sunderland      | 1.11 | .91  | 1.15 | 51.5  | 3,419 | 9.1 | 60.9 | 18 | 1.93 | 139 | 23 | 28 |
| Swindon         | .89  | 1.00 | .97  | 48.3  | 3,167 | 7.0 | 29.5 | 19 | 1.75 | 62  | 10 | 22 |
| Watford         | .82  | 1.05 | .99  | 42.2  | 2,694 | 5.5 | 24.2 | 20 | 1.84 | 82  | 8  | 33 |
| West Bromwich   | 1.18 | 1.09 | .92  | 38.8  | 3,054 | 7.1 | 39.5 | 20 | 1.42 | 74  | 25 | 41 |
| Wolverhampton   | .99  | .97  | .90  | 71.3  | 3,448 | 7.8 | 39.9 | 14 | 1.42 | 140 | 21 | 34 |
| York            | .86  | 1.15 | .97  | 73.9  | 1,861 | 4.1 | 18.7 | 13 | 2.09 | 31  | 11 | 22 |
