# Supplementary material for: Associations between urban metrics and mortality rates in England
Source: PubMed Central journal article supplement (PMC4895780; doi:10.1186/s12940-016-0106-3), 2016-03-08
Supplement: 12940_2016_106_MOESM3_ESM.pdf [file 12940_2016_106_MOESM3_ESM.pdf]

### Additional File 3: Pearson's correlation between urban metrics

---

|                     | Minor Road Density | Junction Density | % pop close to road | Shannon Diversity | Altitude |
|---------------------|--------------------|------------------|---------------------|-------------------|----------|
| Population Density  | 0.803**            | 0.680**          | 0.310*              | -0.606**          | -0.050   |
| Minor Road Density  |                    | 0.915**          | 0.403**             | -0.598**          | 0.092    |
| Junction Density    |                    |                  | 0.593**             | -0.400*           | 0.200    |
| % pop close to road |                    |                  |                     | -0.092            | 0.355*   |
| Shannon Diversity   |                    |                  |                     |                   | 0.200    |

---

\*  $p < 0.05$ ; \*\*  $p < 0.001$
