# Supplementary material for: Associations between urban metrics and mortality rates in England
Source: PubMed Central journal article supplement (PMC4895780; doi:10.1186/s12940-016-0106-3), 2016-03-08
Supplement: 12940_2016_106_MOESM4_ESM.pdf [file 12940_2016_106_MOESM4_ESM.pdf]

**Additional File 4: Association between urban metrics and mortality from all causes and mortality due to CVD and traffic accidents.**

Shown are differences in relative risk (RR) for 2<sup>nd</sup> tertile (T2) and 3<sup>rd</sup> tertile (T3) in relation to the reference category (1<sup>st</sup> tertile)

| Urban metrics              | Model 1 (adjusted for age)<br>RR (95% CI) |                     | Model 2 (additionally adjusted for<br>deprivation and lung cancer mortality)<br>RR (95% CI) |                     |                     |
|----------------------------|-------------------------------------------|---------------------|---------------------------------------------------------------------------------------------|---------------------|---------------------|
|                            | Female (all ages)                         | Male (all ages)     | Female (all ages)                                                                           | Male (all ages)     |                     |
| <b>All-cause mortality</b> |                                           |                     |                                                                                             |                     |                     |
| Population density         | T2                                        | 1.04 [1.04 – 1.05]* | 1.06 [1.06 – 1.07]*                                                                         | 0.97 [0.97 – 0.98]* | 0.98 [0.97 – 0.99]* |
|                            | T3                                        | 1.06 [1.06 – 1.07]* | 1.09 [1.09 – 1.10]*                                                                         | 1.01 [1.01 – 1.02]* | 1.02 [1.01 – 1.03]* |
| Minor Road Density         | T2                                        | 1.08 [1.07 – 1.08]* | 1.09 [1.08 – 1.10]*                                                                         | 0.98 [0.97 – 0.99]* | 1.00 [0.99 – 1.01]  |
|                            | T3                                        | 1.09 [1.08 – 1.10]* | 1.12 [1.11 – 1.23]*                                                                         | 1.01 [1.00 – 1.02]* | 1.01 [1.00 – 1.02]* |
| Junction Density           | T2                                        | 1.08 [1.07 – 1.08]* | 1.07 [1.06 – 1.08]*                                                                         | 1.07 [1.06 – 1.07]* | 1.05 [1.04 – 1.06]* |
|                            | T3                                        | 1.13 [1.12 – 1.13]* | 1.14 [1.13 – 1.15]*                                                                         | 1.08 [1.07 – 1.09]* | 1.05 [1.04 – 1.06]* |
| % pop close to road        | T2                                        | 0.98 [0.98 – 0.99]* | 1.01 [1.01 – 1.02]*                                                                         | 0.98 [0.97 – 0.99]* | 1.02 [1.01 – 1.03]* |
|                            | T3                                        | 1.07 [1.06 – 1.07]* | 1.10 [1.09 – 1.10]*                                                                         | 0.90 [1.01 – 1.02]  | 1.03 [1.02 – 1.04]* |
| Shannon Diversity          | T2                                        | 0.99 [0.98 – 0.99]* | 1.01 [1.00 – 1.02]*                                                                         | 0.96 [0.96 – 0.97]* | 0.98 [0.98 – 0.99]* |
|                            | T3                                        | 0.98 [0.97 – 0.98]* | 0.98 [0.97 – 0.99]*                                                                         | 0.99 [0.99 – 1.00]  | 0.99 [0.98 – 1.00]* |
| Altitude                   | T2                                        | 1.04 [1.03 – 1.05]* | 1.06 [1.05 – 1.06]*                                                                         | 1.00 [1.99 – 1.00]  | 1.02 [1.01 – 1.03]* |
|                            | T3                                        | 1.03 [1.02 – 1.03]* | 1.06 [1.05 – 1.07]*                                                                         | 0.97 [0.97 – 0.98]* | 1.00 [0.99 – 1.00]  |
| <b>CVD mortality</b>       |                                           |                     |                                                                                             |                     |                     |
| Population density         | T2                                        | 1.01 [1.00 – 1.02]  | 1.07 [1.05 – 1.08]*                                                                         | 0.95 [0.94 – 0.96]* | 0.99 [0.98 – 1.00]  |
|                            | T3                                        | 1.02 [1.01 – 1.03]* | 1.08 [1.06 – 1.09]*                                                                         | 0.97 [0.96 – 0.98]* | 1.01 [0.99 – 1.02]  |
| Minor Road Density         | T2                                        | 1.05 [1.03 – 1.06]* | 1.09 [1.08 – 1.11]*                                                                         | 0.97 [0.95 – 0.98]* | 1.00 [0.99 – 1.01]  |
|                            | T3                                        | 1.06 [1.04 – 1.07]* | 1.11 [1.09 – 1.12]*                                                                         | 0.98 [0.97 – 0.99]* | 1.00 [0.99 – 1.01]  |
| Junction Density           | T2                                        | 1.08 [1.07 – 1.09]* | 1.08 [1.06 – 1.09]*                                                                         | 1.07 [1.06 – 1.09]* | 1.05 [1.05 – 1.06]* |
|                            | T3                                        | 1.11 [1.10 – 1.12]* | 1.14 [1.13 – 1.15]*                                                                         | 1.07 [1.06 – 1.09]* | 1.05 [1.04 – 1.07]* |
| % pop close to road        | T2                                        | 0.97 [0.96 – 0.98]* | 1.00 [0.98 – 1.01]                                                                          | 0.97 [0.96 – 0.98]* | 1.00 [0.99 – 1.01]  |

|                                   |    |                     |                     |                     |                     |
|-----------------------------------|----|---------------------|---------------------|---------------------|---------------------|
|                                   | T3 | 1.05 [1.04 – 1.06]* | 1.08 [1.07 – 1.09]* | 1.01 [1.00 – 1.03]* | 1.02 [1.01 – 1.03]* |
| Shannon Diversity                 | T2 | 0.99 [0.98 – 1.00]  | 1.02 [1.01 – 1.04]* | 0.97 [0.96 – 0.98]* | 1.00 [0.99 – 1.01]  |
|                                   | T3 | 1.00 [0.99 – 1.02]  | 0.99 [0.98 – 1.00]  | 1.03 [1.02 – 1.05]* | 1.01 [0.99 – 1.02]  |
| Altitude                          | T2 | 1.02 [1.01 – 1.04]* | 1.04 [1.03 – 1.05]* | 0.99 [0.98 – 1.01]  | 0.99 [0.98 – 1.00]  |
|                                   | T3 | 1.03 [1.02 – 1.04]* | 1.07 [1.05 – 1.08]* | 0.99 [0.98 – 1.00]  | 0.99 [0.98 – 1.01]  |
| <b>Traffic accident mortality</b> |    |                     |                     |                     |                     |
| Population density                | T2 | 0.90 [0.77 – 1.05]  | 0.96 [0.88 – 1.05]  | 0.90 [0.76 – 1.07]  | 0.91 [0.83 – 1.00]  |
|                                   | T3 | 0.87 [0.74 – 1.02]  | 0.84 [0.77 – 0.92]* | 0.88 [0.75 – 1.05]  | 0.80 [0.72 – 0.88]* |
| Minor Road Density                | T2 | 0.87 [0.74 – 1.02]  | 0.98 [0.90 – 1.06]  | 0.85 [0.71 – 1.02]  | 0.89 [0.80 – 0.99]* |
|                                   | T3 | 0.85 [0.73 – 1.00]* | 0.81 [0.74 – 0.88]* | 0.86 [0.72 – 1.04]  | 0.70 [0.63 – 0.77]* |
| Junction Density                  | T2 | 0.91 [0.79 – 1.08]  | 1.03 [0.95 – 1.12]  | 0.92 [0.77 – 1.10]  | 0.97 [0.88 – 1.07]  |
|                                   | T3 | 0.96 [0.83 – 1.11]  | 0.93 [0.86 – 1.01]  | 0.95 [0.80 – 1.13]  | 0.83 [0.75 – 0.92]* |
| % pop close to road               | T2 | 0.79 [0.67 – 0.92]* | 1.00 [0.92 – 1.09]  | 0.74 [0.63 – 0.88]* | 1.02 [0.93 – 1.12]  |
|                                   | T3 | 0.95 [0.82 – 1.10]  | 0.96 [0.89 – 1.04]  | 0.96 [0.82 – 1.12]  | 0.93 [0.86 – 1.02]  |
| Shannon Diversity                 | T2 | 1.09 [0.95 – 1.26]  | 1.11 [1.03 – 1.20]* | 1.10 [0.95 – 1.27]  | 1.11 [1.03 – 1.20]* |
|                                   | T3 | 1.18 [1.00 – 1.40]  | 1.13 [1.03 – 1.24]* | 1.15 [0.96 – 1.38]  | 1.16 [1.05 – 1.28]* |
| Altitude                          | T2 | 0.82 [0.70 – 0.97]* | 0.81 [0.74 – 0.89]* | 0.80 [0.68 – 0.95]* | 0.80 [0.73 – 0.87]* |
|                                   | T3 | 0.84 [0.73 – 0.98]* | 0.98 [0.90 – 1.06]  | 0.84 [0.72 – 0.99]* | 0.96 [0.88 – 1.05]  |

---
